# Supplementary material for: Integrative analysis of viral entry networks and clinical outcomes identifies a protective role for spironolactone in severe COVID-19
Source: medRxiv preprint, doi:10.1101/2022.07.02.22277181, version 1 (2022-07-06)
Supplement: Supplementary Information [file 277181_file03.docx]

**SUPPLEMENTARY INFORMATION**

p.2. Supplementary Table S1. List of medical comorbidities for cohort analysis.

Supplementary Table S1. **List of medical comorbidities for cohort analysis.**

| **Definition:** |
| --- |
| AIDS HIV |
| Cerebrovascular disease |
| Chronic pulmonary disease |
| Congestive heart failure |
| Dementia |
| Diabetes with chronic complications |
| Diabetes without chronic complications |
| Hemiplegia or paraplegia |
| Malignancy |
| Metastatic solid tumor |
| Mild liver disease |
| Moderate or severe liver disease |
| Myocardial infarction |
| Peptic ulcer disease |
| Peripheral vascular disease |
| Renal disease |
| Rheumatic disease |
